# Supplementary material
Source: publisher site journal article supplement (https://neobiota.pensoft.net/article/53208/download/suppl/32/)
Supplement: Supplementary file 1

**Table S1:** Importation of plants for planting from countries, source of *Xylella fastidiosa*.

| **Importer**  **country code** | **Exporters countries**  **(in Tonnes, average period 2000-2016)** | | | |
| --- | --- | --- | --- | --- |
| **ESP, FRA, ITA** | **BRA, CRI, ECU, HND, MEX, USA** | **ARG, CAN, IRN, PRY, TW, VEN** | **All Infected**  **countries** |
| PSE | 18.82 | 0.00 | 0.00 | 18.82 |
| ISL | 3,056.47 | 215.88 | 1,342.94 | 4,615.29 |
| YEM | 41.18 | 0.00 | 4,588.24 | 4,629.41 |
| OMN | 25,984.71 | 93.53 | 34,784.12 | 60,862.35 |
| FIN | 78,822.35 | 2,150.00 | 20,267.65 | 101,240.00 |
| EGY | 78,390.59 | 6,577.65 | 20,177.65 | 105,145.88 |
| SYR | 138,025.29 | 7,886.47 | 2,370.59 | 148,282.35 |
| BHR | 175,068.82 | 70.02 | 4,782.94 | 179,921.78 |
| LTU | 188,968.82 | 0.00 | 1,864.71 | 190,833.53 |
| EST | 243,010.00 | 11.76 | 800.59 | 243,822.35 |
| ISR | 261,890.00 | 74.76 | 27,397.65 | 289,362.41 |
| MKD | 309,532.35 | 24.12 | 537.65 | 310,094.12 |
| MDA | 350,373.53 | 89.91 | 1,324.12 | 351,787.56 |
| SWE | 380,860.59 | 4,787.06 | 18,161.76 | 403,809.41 |
| LUX | 451,842.94 | 108.59 | 272.94 | 452,224.47 |
| KWT | 393,600.59 | 43,667.35 | 41,808.24 | 479,076.18 |
| NOR | 383,840.59 | 19,279.41 | 96,251.76 | 499,371.76 |
| LBY | 503,787.06 | 0.00 | 0.00 | 503,787.06 |
| MNE | 581,132.35 | 6.47 | 6,050.59 | 587,189.41 |
| IRQ | 503,312.35 | 0.00 | 232,067.06 | 735,379.41 |
| LVA | 741,730.00 | 29.41 | 11,857.06 | 753,616.47 |
| SAU | 540,737.06 | 182,400.59 | 53,066.47 | 776,204.12 |
| QAT | 785,021.18 | 10,457.06 | 61,558.24 | 857,036.47 |
| SRB | 861,554.12 | 4,188.12 | 833.53 | 866,575.76 |
| CYP | 946,748.82 | 4,838.82 | 19,262.94 | 970,850.59 |
| BGR | 1,018,266.47 | 514.12 | 86.47 | 1,018,867.06 |
| TUN | 955,277.65 | 2,005.29 | 84,991.18 | 1,042,274.12 |
| JOR | 1,302,654.71 | 1,542.94 | 39,260.59 | 1,343,458.24 |
| SVK | 1,348,848.24 | 1,320.29 | 3,120.59 | 1,353,289.12 |

| **Importer**  **country code** | **Exporters countries**  **(in Tons, average period 2000-2016)** | | | |
| --- | --- | --- | --- | --- |
| **ESP, FRA, ITA** | **BRA, CRI, ECU, HND, MEX, USA** | **ARG, CAN, IRN, PRY, TW, VEN** | **All Infected**  **countries** |
| BIH | 1,356,434.12 | 140.00 | 447.06 | 1,357,021.18 |
| DZA | 1,595,521.18 | 0.00 | 2,828.82 | 1,598,350.00 |
| ARE | 1,175,177.65 | 46,246.65 | 397,910.00 | 1,619,334.29 |
| MLT | 1,872,347.06 | 813.53 | 2,088.82 | 1,875,249.41 |
| CZE | 2,046,503.53 | 3,234.06 | 6,220.59 | 2,055,958.18 |
| IRL | 2,166,720.00 | 1,908.24 | 63,638.24 | 2,232,266.47 |
| SVN | 2,705,809.41 | 41.76 | 2,888.82 | 2,708,740.00 |
| ALB | 3,588,857.65 | 0.00 | 7,006.47 | 3,595,864.12 |
| HUN | 4,147,707.65 | 27,237.06 | 120,380.00 | 4,295,324.71 |
| ROU | 4,787,727.65 | 65.88 | 367.65 | 4,788,161.18 |
| DNK | 4,309,331.18 | 389,829.41 | 182,083.53 | 4,881,244.12 |
| POL | 5,290,882.35 | 153,662.35 | 21,475.29 | 5,466,020.00 |
| HRV | 6,204,183.53 | 17,854.12 | 882.35 | 6,222,920.00 |
| LBN | 6,589,719.41 | 44,212.06 | 39,762.94 | 6,673,694.41 |
| MAR | 7,775,666.47 | 11,884.76 | 41,388.82 | 7,828,940.06 |
| GRC | 8,424,892.35 | 27,551.71 | 16,244.12 | 8,468,688.18 |
| AUT | 8,628,325.29 | 9,031.76 | 4,293.53 | 8,641,650.59 |
| PRT | 15,712,379.41 | 162,668.10 | 157,685.88 | 16,032,733.39 |
| TUR | 16,809,390.59 | 240,557.18 | 117,079.41 | 17,167,027.18 |
| BEL | 19,936,548.24 | 1,714,265.41 | 206,953.53 | 21,857,767.18 |
| CHE | 23,446,927.65 | 29,773.61 | 34,914.71 | 23,511,615.96 |
| ITA | 23,019,206.47 | 679,321.36 | 1,443,027.06 | 25,141,554.89 |
| GBR | 30,347,050.59 | 15,074.71 | 333,475.29 | 30,695,600.59 |
| ESP | 28,203,625.88 | 1,606,839.36 | 2,006,095.29 | 31,816,560.53 |
| DEU | 70,721,208.82 | 449,902.83 | 183,447.06 | 71,354,558.72 |
| NLD | 45,975,455.29 | 22,551,721.33 | 7,905,631.76 | 76,432,808.39 |
| FRA | 102,469,007.06 | 108,341.87 | 381,693.53 | 102,959,042.46 |

**Source:** Our elaboration based on retrieved data by <https://resourcetrade.earth/data> and <https://cus93.trade.gov.tw>. Access date: 10th July 2018. From the first link (<https://resourcetrade.earth/data>), data were retrieved for Argentina, Brazil, Canada, Costa Rica, Mexico, Paraguay, Puerto Rico, USA, Venezuela, Iran, France, Germany, Italy and Spain. From the second link (<https://resourcetrade.earth/data>), data were retrieved for Taiwan only: The international code (ISO3) of each country is used.
